# Supplementary material
Source: PubMed Central journal article supplement (PMC3061436)
Supplement: NIHMS275733-supplement-supplement_1.pdf [file NIHMS275733-supplement-supplement_1.pdf]

## Supplementary Materials and Methods

### *Evaluation of Pancreatic Exocrine Function*

Pancreatic exocrine function was evaluated by the secretin test, as before.<sup>1</sup> In brief, duodenal intubation was performed to collect pancreatic juice. After an acclimation period, 80 U/body of either porcine (SecreFlo, Repligen, Waltham, MA) or human secretin (ChiRhoStim, ChiRhoClin, Inc, Burtonsville, MD) was administered intravenously and pancreatic juice was collected into an ice-chilled tube every 10 minutes for 60 minutes. Total secreted volume (V:mL/h) and total amylase output (U/h) were measured. The HCO<sub>3</sub><sup>-</sup> concentration in each sample was measured and the highest value was set as the maximum HCO<sub>3</sub><sup>-</sup> concentration (MBC:mEq/L).

Secretin tests were performed at the time of diagnosis, 3 months after initiation of treatment (short-term) and 1 year (long-term) after initiation of therapy.

### *Immunohistochemistry*

Biopsy samples or surgically resected tissues were fixed in 10% formalin and embedded in paraffin. Sections were deparaffinized, permeabilized, and used for immunohistochemistry.<sup>2</sup> AQP1 localization was examined using an anti-rat AQP1 IgG at 1:1000 dilution (AQP11-A; Alpha Diagnostics, San Antonio, TX). CFTR localization was examined using 3 separate monoclonal anti-human CFTR antibodies against different epitopes in CFTR (M3A7, Millipore Corp, Billerica, MA; #13-1 and #24-1, R&D Systems (Minneapolis, MN), all at 1:40 dilution). IgG4-positive plasma cells were immunostained with an anti-IgG4 antibody (The Binding Site, Birmingham, UK) at 1:200 dilution. CD133 localization was examined using an anti-prominin-1 antibody at 1:10 dilution (MB9-3G8; Miltenyi Biotec GmbH, Bergisch Gladbach, Germany). Dilutions for all antibodies followed the manufacturer's recommendations. Immunoreactions were intensified using either Envision plus reagent (DAKO, Glostrup, Denmark) or Histofine Simple Stain MAX-PO (Nichirei Biosciences, Inc, Tokyo, Japan). Immunolabeling was visualized using 3,3'-diaminobenzidine tetrahydrochloride as substrate for horseradish peroxidase. Sections finally were counterstained with Mayer's hematoxylin.

### *Histologic Scoring*

Tissue sections were examined and semiquantitated based on the intensity of 3,3'-diaminobenzidine tetrahydrochloride staining of CFTR at the cytoplasm in pancreatic duct cells by an independent observer (S.A.) who was blinded to the clinical information. The entire sections were examined for each sample and scored on a scale of 0–3 (0, no cytoplasmic staining of CFTR; 3, severe cytoplasmic staining of CFTR).

The extent of IgG4-positive plasma cell infiltration also was evaluated by an independent observer (S.A.) who was blinded to the clinical information. The extent was

scored on a scale of 0–3 according to the number of immunohistochemically identified IgG4-positive plasma cells per high-power field in each specimen. Sections with less than 5 positive plasma cells/high-power field were scored as 0, sections with 5–10 cells were scored as 1, sections with 11–30 cells were scored as 2, and tissues with more than 30 positive cells/high-power field were scored as 3.

### *Genetic Studies*

Genomic DNA was extracted from peripheral blood leukocytes by a standard isolation procedure using QIAamp DNA blood mini kit (Qiagen, Hilden, Germany). All 27 CFTR exons of 5 AIP patients who agreed to the genetic analysis, including flanking intronic regions, were amplified using human CFTR gene-specific primers as shown in [Supplementary Table 1](#). Amplicons were sequenced at Shimadzu Biotech (Kyoto, Japan) with the same primers used for fragment amplifications except for exon 9. Genetic analyses of a CFTR gene were performed at Nagoya University Hospital and the procedure was approved by the ethics committee of the hospital. Written informed consent was obtained from each patient.

## Results

### *Cytoplasmic Mislocalization of CFTR Was Confirmed With Different Anti-Human CFTR Antibodies*

To validate observations in [Figure 4](#) and to ensure that the findings were not dependent on the antibodies used to immunolocalize CFTR, we have used 2 additional distinct anti-CFTR antibodies that recognize different CFTR epitopes. Identical immunolabeling of CFTR in the apical plasma membrane of pancreatic ducts in normal subjects and a large cytoplasmic mislocalization in tissue from AIP patients were confirmed by antibodies 13-1 (anti-R domain of CFTR) and 24-1 (anti-C terminus of CFTR), as reported by M3A7 (data not shown).

### *CFTR Genotypes in AIP*

Mutations in CFTR have been reported in a subgroup of patients with idiopathic chronic pancreatitis in the Caucasian population. Some of the CF-causing mutations in CFTR are known to affect trafficking of the protein to the plasma membrane. However, the incidence of CF in Japanese people is extremely low (<1 per 350,000 live births).<sup>3</sup> In addition, none of the 20 common CFTR mutations reported in the white population and the 9 mutations causing CF in Japanese people<sup>4</sup> was found in normal subjects and chronic pancreatitis patients. Thus, it is unlikely that germline mutations in CFTR caused the mistrafficking of the protein in pancreatic duct cells in the Japanese patients with AIP. To further exclude the possibility that mutations in CFTR are responsible for the findings in our patient popula-

**Supplementary Table 1.** Primers Used in this Study to Amplify CFTR Gene Fragments

| CFTR exon no   | Forward primer                        | Reverse primer                        | Size, bp | Temperature |
|----------------|---------------------------------------|---------------------------------------|----------|-------------|
| 1-1            | 5'-GTT TTG CTG ACT GAG ACT AGG-3'     | 5'-CAA CGC TGG AGG ACA GAA GAA-3'     | 590      | 60°C        |
| 1-2            | 5'-AAA CGT AAC AGG AAC CCG ACT A-3'   | 5'-CTC AAC CCT TTT TCT CTG ACC T-3'   | 559      | 60°C        |
| 1-3            | 5'-GGA GAA AGC CGC TAG AGC AAA-3'     | 5'-GTG GCT CTC TAT TCA ATC AGC-3'     | 504      | 62°C        |
| 2              | 5'-TGT AAG AGA TGA AGC CTG GTA-3'     | 5'-GCT CCT ATT TTT AAA TAT AAG-3'     | 384      | 50°C        |
| 3              | 5'-CCA TGA GAT TTT GTC TCT ATA-3'     | 5'-GAG TTG GAT TCA TCC TTT ATA-3'     | 365      | 55°C        |
| 4              | 5'-AAG AGT TTC ACA TAT GGT ATG-3'     | 5'-TGC CAT TTA TTT AAT AGG CAT-3'     | 496      | 60°C        |
| 5              | 5'-GAA GAT AGT AAG CTA GAT GAA-3'     | 5'-AAT TGA CCT TTC TTA GTT TCC-3'     | 393      | 60°C        |
| 6a             | 5'-AGT GTG CTC AGA ACC ACG AAG-3'     | 5'-GTT CTA TGC ATA GAG CAG TCC-3'     | 428      | 60°C        |
| 6b             | 5'-TGG AAT GAG TCT GTA CAG CG-3'      | 5'-TGC ATG AAT ATT GAC AGA ACT-3'     | 475      | 60°C        |
| 7              | 5'-TAT AGG CAG AAA GAC TCT AGA-3'     | 5'-TCC TAG TAT TAG CTG GCA ACT-3'     | 504      | 60°C        |
| 8              | 5'-TGA ATC CTA GTG CTT GGC AAA-3'     | 5'-TCC TTC CAG TTC TAC CAG TTA-3'     | 400      | 60°C        |
| 9              | 5'-CCA TGT GCT TTT CAA ACT AAT TGT-3' | 5'-TAA AGT TAT TGA ATG CTC GCC ATG-3' | 578      | 60°C        |
| 9 (sequencing) | 5'-CCA TGT GCT TTT CAA ACT AAT TGT-3' | 5'-CAA CCG CCA ACA ACT GTC CT-3'      | 274      | 60°C        |
| 10             | 5'-TTG TGC ATA GCA GAG TAC CTG AAA-3' | 5'-ATT GAT CCA TTC ACA GTA GCT-3'     | 506      | 60°C        |
| 11             | 5'-ACT GTG GTT AAA GCA ATA GTG-3'     | 5'-TAA ATG TGA TTC TTA ACC CAC-3'     | 359      | 55°C        |
| 12             | 5'-CTT CTG CAC CAC TTT TGA GAA-3'     | 5'-GCT ACA TTC TGC CAT ACC AA-3'      | 368      | 60°C        |
| 13-1           | 5'-GGT ACC AAT TTA ATT ACT ACA G-3'   | 5'-ATT TGT AAG GGA GTC TTT TGC-3'     | 562      | 60°C        |
| 13-2           | 5'-TGG GAT GTG ATT CTT TCG ACC-3'     | 5'-GGG AAG AGA TAT GTC CAT TGC-3'     | 767      | 62°C        |
| 14a            | 5'-ACA CTT AGA TTC AAG TAA TAC T-3'   | 5'-CAG AAG CTA AGA ACT ATA TGA-3'     | 471      | 55°C        |
| 14b            | 5'-GAC CCA GGA ACA CAA AGC AAA-3'     | 5'-TTC CAC TAC CAT AAT GCT TGG-3'     | 297      | 60°C        |
| 15             | 5'-GGT TAA GGG TGC ATG CTC TTC-3'     | 5'-AAG CCA GCA CTG CCA TTA-3'         | 472      | 60°C        |
| 16             | 5'-TCT GAA TGC GTC TAC TGT GA-3'      | 5'-GCA ATA GAC AGG ACT TCA AC-3'      | 298      | 60°C        |
| 17a            | 5'-AGA AAT AAA TCA CTG ACA CAC-3'     | 5'-CCA TGT GTA CTT TGT AAT ATA G-3'   | 410      | 55°C        |
| 17b            | 5'-TTT AAC CAA TGA CAT TTG TGA-3'     | 5'-ATA CCG ATT TCA AGG AAA TTA-3'     | 552      | 53°C        |
| 18             | 5'-TAG GAG AAG TGT GAA TAA AG-3'      | 5'-GAT ACA CAG TGA CCC TCA ATT-3'     | 303      | 60°C        |
| 19             | 5'-ATT GAA AAG CCC GAC AAA TAA-3'     | 5'-AGT TCA GAC TCT GCA AAT TAA-3'     | 574      | 55°C        |
| 20             | 5'-CAG GAT TGA AAG TGT GCA ACA-3'     | 5'-CTA TGA GAA AAC TGC ACT GGA-3'     | 470      | 60°C        |
| 21             | 5'-AAA ATG TTC ACA AGG GAC TCC-3'     | 5'-GTT GTG CAC ACA CAT ACA TGC-3'     | 434      | 62°C        |
| 22             | 5'-CAC GTA ATA GAC ACT CAT TGA-3'     | 5'-ATT TCC ACT GGG CAA TTA TTT-3'     | 571      | 57°C        |
| 23             | 5'-GCT GAT TGT GCG TAA CGC TAT-3'     | 5'-AGT AAA GCT GGA TGG CTG TAT-3'     | 401      | 60°C        |
| 24             | 5'-TTT CTG TCC CTG CTC TGG TC-3'      | 5'-ACT ATT GCC AGG AAG CCA TTT-3'     | 471      | 60°C        |

tion, we have sequenced the entire coding regions and flanking intronic regions of the CFTR gene of 5 patients with AIP. CFTR genotypes of these patients are summarized in [Supplementary Table 2](#). None of the major CF-causing mutations in CFTR were found in these patients. The ratio of each haplotype, including polythymidine tract or TG repeats in intron 8 and the ratio of methionine or valine residue at position 470 in exon 10 were similar to the data in the previous analysis of CFTR genotypes in normal Japanese people.<sup>4</sup> A Q1352H mutation in one allele with a wild type in the second allele was found in one patient with AIP (case 3), and no other

mutations were identified in coding regions of CFTR in all other patients.

## Discussion

Some of the mutations in CFTR are known to affect trafficking of the protein to the plasma membrane.<sup>5</sup> Sequencing entire open reading frames and flanking intronic regions identified a single mutated allele (Q1352H) out of 10 alleles in 5 AIP patients examined, excluding the possibility of mutations in CFTR as the cause of partial mistargeting of proteins in these patients. The allele frequency of TG repeats and polythymidine tract in intron 8, which affect the transcription efficiency of CFTR, were similar to our previous observation in normal Japanese subjects.<sup>4</sup> The Q1352H mutation in combination with a V470 haplotype was reported to show a decreased chloride channel activity in vitro that may result in pathogenicity.<sup>6</sup> However, our patient with the Q1352H mutation showed complete recovery of fluid and HCO<sub>3</sub><sup>-</sup> transport by secretin test after several years of corticosteroids treatment (Shigeru B.H.K., unpublished observation). Therefore, at least in this patient, it is unlikely that Q1352H heterozygosity affects localization of CFTR, and thus aberrant HCO<sub>3</sub><sup>-</sup> secretion, because steroids are not expected to correct mislocalization caused by mutations in CFTR.

**Supplementary Table 2.** CFTR Genotypes in Japanese Patients With Autoimmune Pancreatitis

| Case no | Age/sex | CFTR genotype |        |         |           |
|---------|---------|---------------|--------|---------|-----------|
|         |         | n (TG)        | Poly T | 470 M/V | Mutation  |
| 3       | 61/M    | 11/12         | 7/7    | M/V     | Q1352H/WT |
| 7       | 72/M    | 11/12         | 7/7    | V/V     | None      |
| 9       | 68/M    | 12/12         | 7/7    | M/V     | None      |
| 12      | 61/M    | 12/12         | 6/7    | M/V     | None      |
| 13      | 66/M    | 11/11         | 7/7    | V/V     | None      |

M, methionine; V, valine.

CD133 is a membrane protein expressed in small pancreatic ducts in a fetal and adult pancreas and is considered a good marker for pancreatic stem/progenitor cells that can differentiate into endocrine and exocrine cells.<sup>7,8</sup> CD133 protein expression appears to be confined to the apical membrane of small pancreatic ducts in AIP and corticosteroid treatment did not alter the expression pattern and localization of the protein. Similarly, although expression of AQP1 was up-regulated markedly in AIP, localization of AQP1 remained unaltered. Therefore, it is unlikely that mislocalization of CFTR is caused by a general mislocalization of apical membrane protein. Differences in the expression levels in each protein or discrete functions in the plasma membrane may explain these discrepancies, although the function of CD133 remains unclear.

The finding that corticosteroid treatment regenerates the parenchyma and increases digestive enzyme secretion in AIP was surprising. The presence of CD133 immunolabeling in the apical membrane of small pancreatic ducts surrounded by regenerated acinar cells and the absence of CD133 expression in untreated pancreas or residual fibrotic area in tissues from patients treated with corticosteroids may be a clue to better understand the cellular mechanisms of pancreatic organ development and regeneration. Detailed roles of CD133 in pancreatic organ regeneration in chronic pancreatitis remain to be determined.

## References

1. Kitagawa M, Naruse S, Ishiguro H, et al. Evaluating exocrine function tests for diagnosing chronic pancreatitis. *Pancreas* 1997; 15:402–408.
  2. Yatabe Y, Koga T, Mitsudomi T, et al. CK20 expression, CDX2 expression, K-ras mutation, and goblet cell morphology in a subset of lung adenocarcinomas. *J Pathol* 2004;203:645–652.
  3. Yamashiro Y, Shimizu T, Oguchi S, et al. The estimated incidence of cystic fibrosis in Japan. *J Pediatr Gastroenterol Nutr* 1997;24:544–547.
  4. Fujiki K, Ishiguro H, Ko SB, et al. Genetic evidence for CFTR dysfunction in Japanese: background for chronic pancreatitis. *J Med Genet* 2004;4:e55.
  5. Cheng SH, Gregory RJ, Marshall J, et al. Defective intracellular transport and processing of CFTR is the molecular basis of most cystic fibrosis. *Cell* 1990;63:827–834.
  6. Lee JH, Choi JH, Namkung W, et al. A haplotype-based molecular analysis of CFTR mutations associated with respiratory and pancreatic diseases. *Hum Mol Genet* 2003;12:2321–2332.
  7. Hori Y, Fukumoto M, Kuroda Y. Enrichment of putative pancreatic progenitor cells from mice by sorting for prominin1 (CD133) and platelet-derived growth factor receptor beta. *Stem Cells* 2008;26: 2912–2920.
  8. Koblas T, Pektorova L, Zacharovova K, et al. Differentiation of CD133-positive pancreatic cells into insulin-producing islet-like cell clusters. *Transplant Proc* 2008;40:415–418.
-
